# Supplementary material for: Co-oxidation of octane and benzaldehyde using molecular oxygen with Au–Pd/carbon prepared by sol-immobilisation
Source: Royal Society of Chemistry journal article supplement (doi:10.1039/c5cy00453e), 2015-01-01
Supplement: c5cy00453e1.pdf [file c5cy00453e1.pdf]

Supporting Online Material for

## Co-oxidation of octane and benzaldehyde using molecular oxygen with Au- Pd/Carbon prepared by sol-immobilisation

Virginie Peneau, Greg Shaw, Simon J. Freakley, Michael Forde, Nikolaos Dimitratos, Robert L. Jenkins, Stuart H. Taylor and Graham J. Hutchings\*

Cardiff Catalysis Institute, School of Chemistry, Cardiff University, Main Building, Park Place,  
Cardiff, CF10 3AT, United Kingdom. Tel: +44 (0) 2920874059, Fax: +44(0) 2090874 030

\*Corresponding author: Hutch@cf.ac.uk

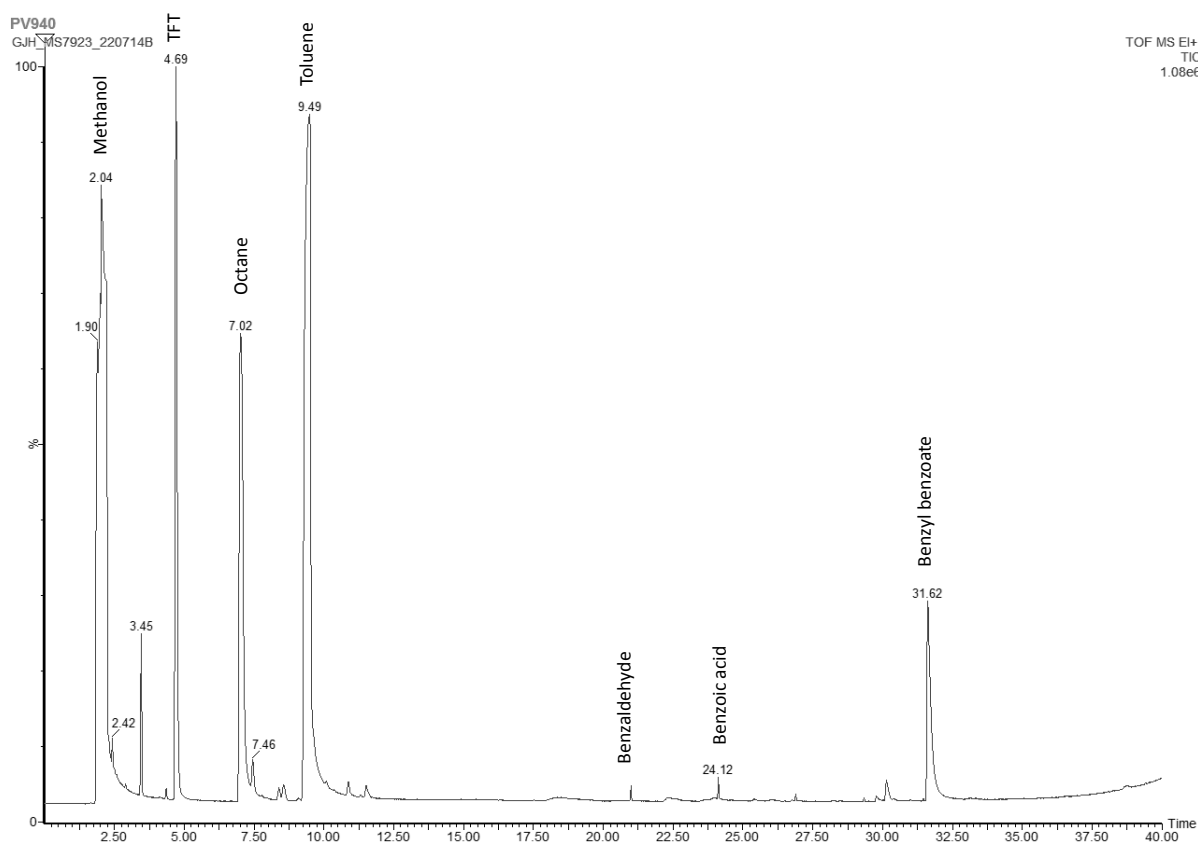

**Figure S1** – GC-MS chromatogram for the co-reaction of octane and toluene  
TFT: Trifluorotoluene, external standard.
